# Supplementary material for: One-pot synthesis of hematite@graphene core@shell nanostructures for superior lithium storage
Source: Royal Society of Chemistry journal article supplement (doi:10.1039/c3nr03484d), 2013-01-01
Supplement: c3nr03484d.pdf [file c3nr03484d.pdf]

# One-Pot Synthesis of Hematite@Graphene Core@Shell Nanostructures for Superior Lithium Storage

Dezhi Chen,<sup>a\*</sup> Hongying Quan,<sup>a</sup> Junfei Liang<sup>b</sup> and Lin Guo<sup>b\*</sup>

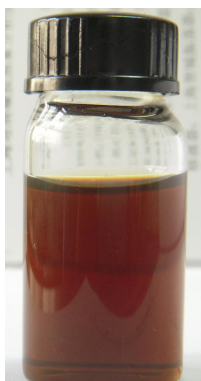

Figure S1. Typical digital photograph of 1 mg/mL GO suspension.

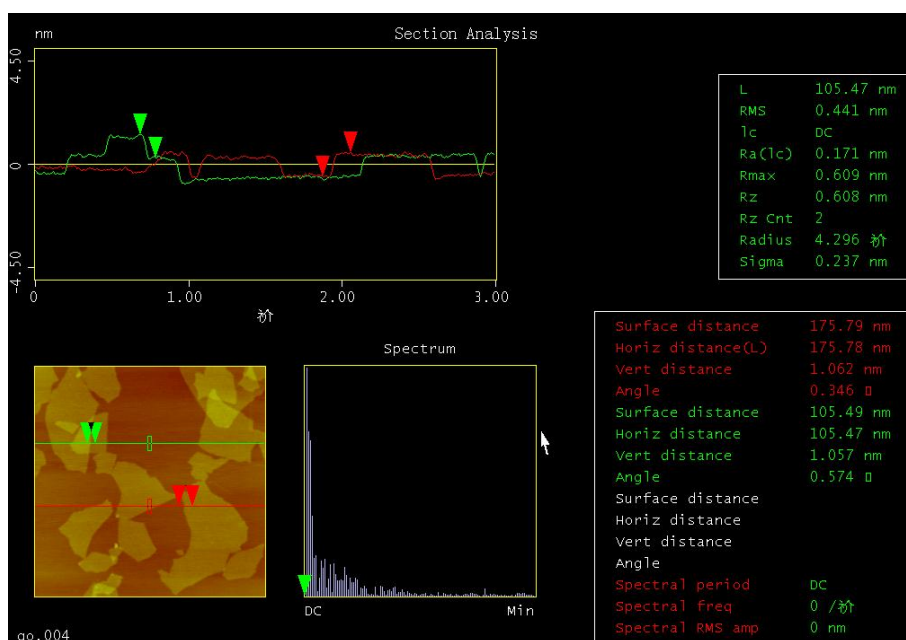

Figure S2. AFM image and section analysis of GO nanosheets

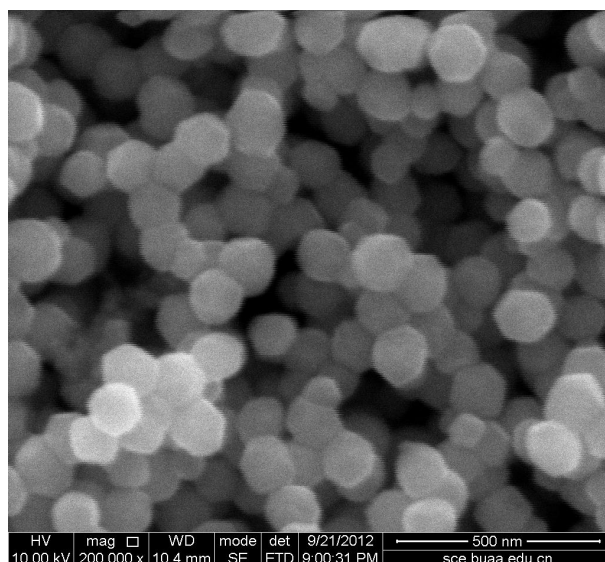

Figure S3. Typical SEM image of **pristine HNs**.

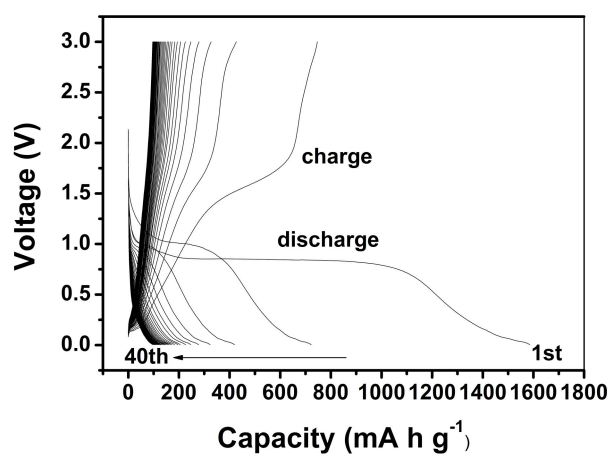

Figure S4. Galvanostatic discharge-charge profiles of bare HN electrode at 200 mA g<sup>-1</sup>.

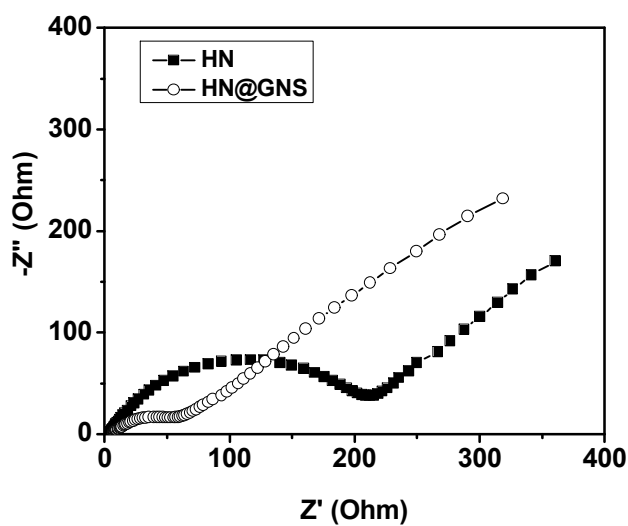

Figure S5. Nyquist plots of HN and HN/GNS electrodes obtained by applying a sine wave with amplitude of 5.0 mV over the frequency range from 100 kHz to 0.01 Hz.
